# Supplementary material
Source: PubMed Central journal article supplement (PMC8000508)
Supplement: pnas.2021757118.sapp.pdf [file pnas.2021757118.sapp.pdf]

# PNAS

[www.pnas.org](http://www.pnas.org)

**Supplementary Information for:  
Decoupling expression and editing preferences of ADAR1 p150 and  
p110 isoforms**

Tony Sun<sup>1</sup>  
Yingpu Yu<sup>1</sup>  
Xianfang Wu<sup>1</sup>  
Ashley Acevedo<sup>1</sup>  
Ji-Dung Luo<sup>2</sup>  
Jiayi Wang<sup>1</sup>  
William M. Schneider<sup>1</sup>  
Brian Hurwitz<sup>3</sup>  
Brad R. Rosenberg<sup>4</sup>  
Hachung Chung<sup>5\*</sup>  
Charles M. Rice<sup>1\*</sup>

<sup>1</sup>Laboratory of Virology and Infectious Disease, The Rockefeller University, New York, NY 10065.

<sup>2</sup>Bioinformatics Resource Center, The Rockefeller University, New York, NY 10065.

<sup>3</sup>Laboratory of Mammalian Cell Biology and Development, The Rockefeller University, New York, NY 10065.

<sup>4</sup>Department of Microbiology, Icahn School of Medicine at Mount Sinai, New York, NY 10029.

<sup>5</sup>Department of Microbiology and Immunology, Vagelos College of Physicians and Surgeons, Columbia University, New York, NY 10032.

\*Correspondence: [hc3070@cumc.columbia.edu](mailto:hc3070@cumc.columbia.edu), [ricec@rockefeller.edu](mailto:ricec@rockefeller.edu)

**This PDF file includes:**

Figures S1 to S4

Tables S1 to S2

Legends for datasets S1 to S5

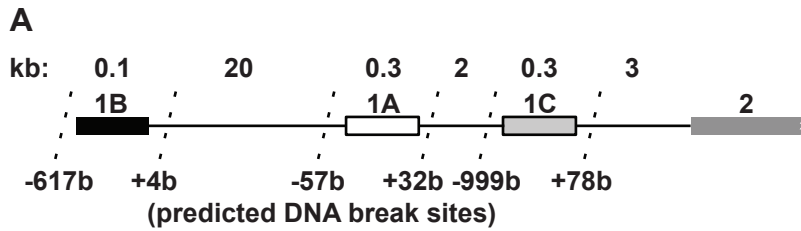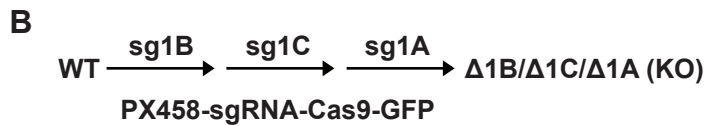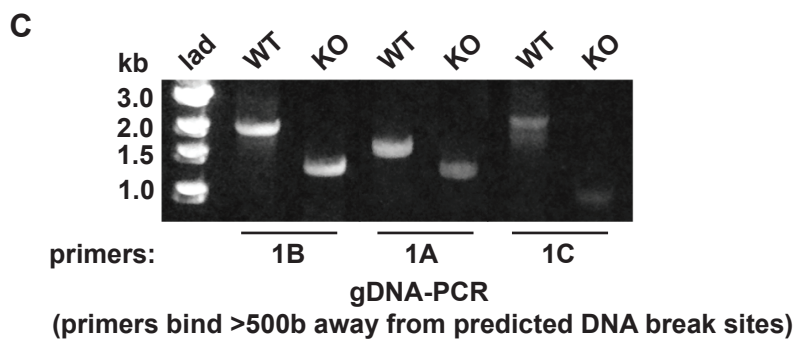

predicted gDNA-PCR products (kb)

|    | 1B  | 1A  | 1C  |
|----|-----|-----|-----|
| WT | 2.1 | 1.8 | 2.4 |
| KO | 1.3 | 1.4 | 1.1 |

**Figure S1. Generation and validation of ADAR1 exon-specific knockout clones**

(A) Part of the human ADAR1 gene locus is shown with predicted Cas9-mediated break sites around exons 1B, 1A, and 1C shown using dotted arrows. The approximate lengths of the exons and introns are indicated above in kilobases. Guide RNA sequences are listed in SI Appendix, Table S1.

(B) The schematic shows the iterative process of CRISPR-Cas9 gene engineering followed by single-cell cloning used to generate the final  $\Delta 1B/\Delta 1C/\Delta 1A$  (ADAR1 knockout) cell line.

(C) The gel shows PCR products generated from genomic DNA extracted from WT and  $\Delta 1B/\Delta 1C/\Delta 1A$  (KO) cell lines. The bands for the ADAR1 KO sample reveal deletion of exons 1B, 1A, and 1C. Primer sequences are listed in SI Appendix, Table S2.

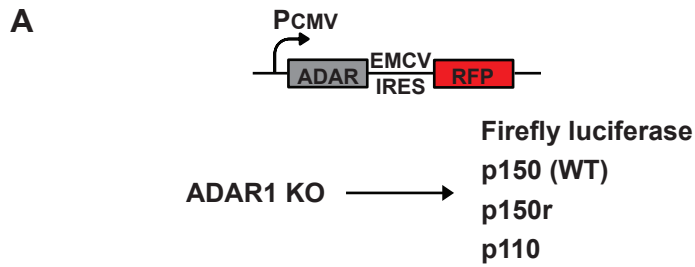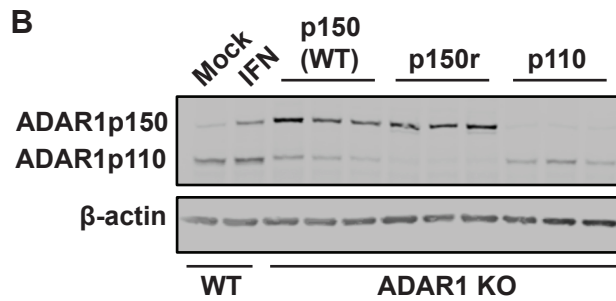

**Figure S2. Generation of clones for editing analysis**

(A) The schematic shows the bicistronic expression plasmid used for stable expression of firefly luciferase, WT p150, p150r, and p110 coding sequences in ADAR1 KO cells. The plasmids were first packaged into lentivirus, which was then used to deliver the sequences into the genome of ADAR1 KO cells.

(B) The immunoblot shows a comparison of ADAR1 p150 and p110 expression levels between endogenous (exon 1B, 1A, and 1C promoters) and exogenous promoters (in cells stably integrated with the plasmids in panel A).

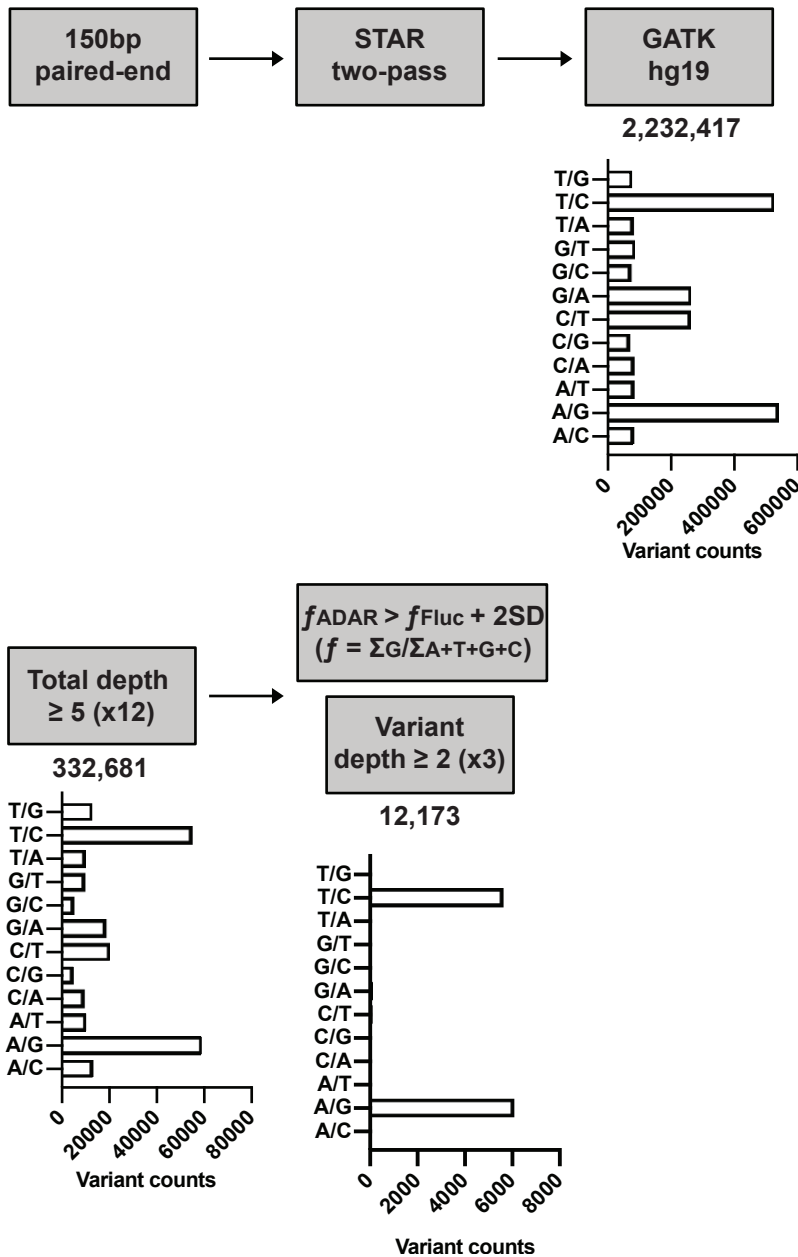

**Figure S3. Editing analysis workflow**

Following sequencing of total RNA and alignment of reads, variant calling yielded counts as shown in the bar graphs for the twelve possible types of mutations. The counts of total variants at each filtering step are shown above the bar graphs. Further details regarding filtering and identification of putative ADAR1-edit sites are in the methods section.

**A**

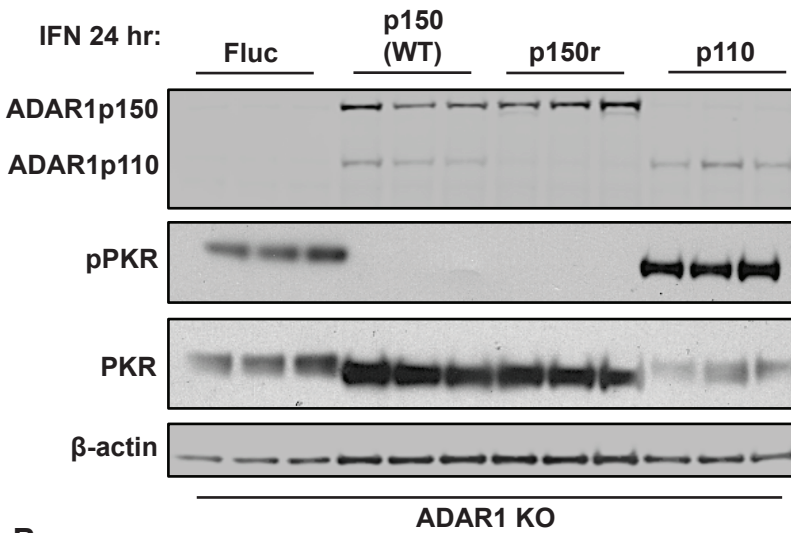

**B**

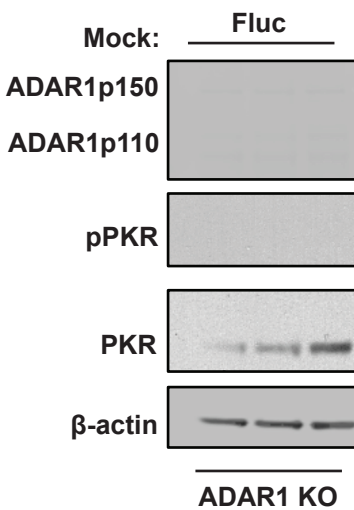

**Figure S4. ADAR1 isoform-selective suppression of PKR activation**

(A) The immunoblot shows activation (phosphorylation) of PKR following interferon treatment of ADAR1 KO cells that are stably expressing firefly luciferase (Fluc), WT p150, p150r, or p110 coding sequences.

Three different clones are shown for each group.

(B) The immunoblot shows that PKR activation specifically occurs when ADAR1 KO cells are treated with interferon.

**Table S1. Guide RNA sequences**

| <b>ADAR1 exon</b> | <b>Target sequence with PAM</b> |
|-------------------|---------------------------------|
| 1B-upstream       | CAAACCTCATCTAGAGGCC(TGG)        |
| 1B-downstream     | AGAAGGACAGAGGCTTTAC(CGG)        |
| 1C-upstream       | GATACTGCTTAGTAGTGAAG(AGG)       |
| 1C-downstream     | GCTACTCTTGCCCAAATC(TGG)         |
| 1A-upstream       | CGTAGTTCTCATGCAGCGGA(GGG)       |
| 1A-downstream     | CTTGGACCTTCGCCGCGTC(TGG)        |

**Table S2. Primer sequences**

| <b>Primer name</b> | <b>Sequence</b>                                                       |
|--------------------|-----------------------------------------------------------------------|
| ATM-F              | CATACAGCAGGCCATAGACC                                                  |
| ATM-R              | GGCCACAGCAACCTTACCTCCCAG                                              |
| ADAR1-F            | ATGAATCCGCGGCAGGGGTATTC                                               |
| ADAR1-R            | GGTAAGGCCAATATTTTTAGCCAAATTC                                          |
| M296L-F            | GATCCTCTTGAGTTTTTAGACCTCGCCGAGATCAAGGAGAAAATC                         |
| M296L-R            | GATTTTCTCCTTGATCTCGGCGAGGTCTAAAACTCAAGAGGATC                          |
| KOZAK1-F           | TCAGGCTTGAACCAGCACAG                                                  |
| KOZAK1-R           | AGTCGCAGATTTTCTCCTTGATCTTTAGCATAAAAAAACTCAAGAGGATCTTCCAAG             |
| KOZAK2-F           | CTGCCTTGAAGATCCTCTTGAGTTTTTTTTATGCTAAAGATCAAGGAGAAAATCTGCG            |
| KOZAK2-R           | TTTGATGTGGGTATATTACAGG                                                |
| TMEM120B-RT        | GGGCTCGGAGATGTGTATAAGAGACAGNNNNNNNNNACTCTTGGGTGAGGCATGG               |
| TMEM120B-PCR1      | TCGTGCGCAGCGTCAGATGTGTATAAGAGACAGTCAAGACAGAAAGGACTTCCAGCC             |
| PDE12-RT           | GGGCTCGGAGATGTGTATAAGAGACAGNNNNNNNNNCCATTTCTCCAACTATTCCACAGG          |
| PDE12-PCR1         | TCGTGCGCAGCGTCAGATGTGTATAAGAGACAGGTGATATACACTTTTAAAAGGATTTATT<br>GCGC |
| i5-UDP0001 (X1)    | AATGATACGGCGACCACCGAGATCTACACTCGTGGAGCGTCGTCGGCAGCGTC                 |
| i7-UDP0001 (X1)    | CAAGCAGAAGACGGCATAACGAGATCGCTCAGTTCGTCTCGTGGGCTCGG                    |
| i5-UDP0002 (X2)    | AATGATACGGCGACCACCGAGATCTACACCTACAAGATATCGTCGGCAGCGTC                 |
| i7-UDP0002 (X2)    | CAAGCAGAAGACGGCATAACGAGATTATCTGACCTGTCTCGTGGGCTCGG                    |
| i5-UDP0003 (X3)    | AATGATACGGCGACCACCGAGATCTACACTATAGTAGCTTCGTCGGCAGCGTC                 |
| i7-UDP0003 (X3)    | CAAGCAGAAGACGGCATAACGAGATATATGAGACGGTCTCGTGGGCTCGG                    |
| i5-UDP0004 (C1)    | AATGATACGGCGACCACCGAGATCTACACTGCCTGGTGGTTCGTCGGCAGCGTC                |
| i7-UDP0004 (C1)    | CAAGCAGAAGACGGCATAACGAGATCTTATGGAATGTCTCGTGGGCTCGG                    |
| i5-UDP0005 (C7)    | AATGATACGGCGACCACCGAGATCTACACACATTATCCTTCGTCGGCAGCGTC                 |
| i7-UDP0005 (C7)    | CAAGCAGAAGACGGCATAACGAGATTAATCTCGTCTCGTGGGCTCGG                       |
| i5-UDP0006 (C10)   | AATGATACGGCGACCACCGAGATCTACACGTCCACTTGTTTCGTCGGCAGCGTC                |
| i7-UDP0006 (C10)   | CAAGCAGAAGACGGCATAACGAGATGCGCGATGTTGTCTCGTGGGCTCGG                    |
| i5-UDP0007 (F5)    | AATGATACGGCGACCACCGAGATCTACACTGGAACAGTATCGTCGGCAGCGTC                 |
| i7-UDP0007 (F5)    | CAAGCAGAAGACGGCATAACGAGATAGAGCACTAGGTCTCGTGGGCTCGG                    |
| i5-UDP0008 (F7)    | AATGATACGGCGACCACCGAGATCTACACCCTTGTTAATTCGTCGGCAGCGTC                 |
| i7-UDP0008 (F7)    | CAAGCAGAAGACGGCATAACGAGATTGCCTTGATCGTCTCGTGGGCTCGG                    |

|                 |                                                         |
|-----------------|---------------------------------------------------------|
| i5-UDP0009 (F8) | AATGATACGGCGACCACCGAGATCTACACGTTGATAGTGTCTCGTCGGCAGCGTC |
| i7-UDP0009 (F8) | CAAGCAGAAGACGGCATAACGAGATCTACTCAGTCGTCTCGTGGGCTCGG      |
| i5-UDP0010 (Z2) | AATGATACGGCGACCACCGAGATCTACACACCAGCGACATCGTCGGCAGCGTC   |
| i7-UDP0010 (Z2) | CAAGCAGAAGACGGCATAACGAGATTCGTCTGACTGTCTCGTGGGCTCGG      |
| i5-UDP0011 (Z6) | AATGATACGGCGACCACCGAGATCTACACCATACTGTTCTCGTCGGCAGCGTC   |
| i7-UDP0011 (Z6) | CAAGCAGAAGACGGCATAACGAGATGAACATAACGGTCTCGTGGGCTCGG      |
| i5-UDP0012 (Z8) | AATGATACGGCGACCACCGAGATCTACACGTGTGGCGCTTCGTGGCAGCGTC    |
| i7-UDP0012 (Z8) | CAAGCAGAAGACGGCATAACGAGATCCTATGACTCGTCTCGTGGGCTCGG      |
| 1B-screening-F  | GGAAGTTTCCTTCTCTTTTCCCC                                 |
| 1B-screening-R  | CTCCGCTAATTGCATACTTGGG                                  |
| 1C-screening-F  | GTGTGTCGTCTTGCCAAGCAGC                                  |
| 1C-screening-R  | CAGCCCTTGGGGTTTCCTCTCC                                  |
| 1A-screening-F  | TACTAAAGCCTTCAGACCTG                                    |
| 1A-screening-R  | CTATAAAGTGGTTAACAAGCTTTC                                |



**Dataset S1 (separate file). Putative ADAR1-edit sites**

The 12,173 putative ADAR1-edit sites are listed with total read depth (DP), mismatch read depth (AC), mismatch frequency (AF), and annotations for all samples in groups X (firefly luciferase), C (WT p150), F (p150r), and Z (p110).

**Dataset S2 (separate file). Putative ADAR1 p150-selective edit sites**

The 192 putative p150-selective edit sites are listed with total read depth (DP), mismatch read depth (AC), mismatch frequency (AF), and annotations for all samples in groups X (firefly luciferase), C (WT p150), F (p150r), and Z (p110).

**Dataset S3 (separate file). Putative ADAR1 p150+p110-shared edit sites**

The 119 putative p150/p110-shared edit sites are listed with total read depth (DP), mismatch read depth (AC), mismatch frequency (AF), and annotations for all samples in groups X (firefly luciferase), C (WT p150), F (p150r), and Z (p110).

**Dataset S4 (separate file). Genes with putative ADAR1 p150-selective edit sites**

Genes containing putative p150-selective edit sites are listed.

**Dataset S5 (separate file). Genes with putative ADAR1 p150+p110-shared edit sites**

Genes containing putative p150/p110-shared edit sites are listed.
